# Supplementary material for: Highly Multiplexed Imaging Uncovers Changes in Compositional Noise within Assembling Focal Adhesions
Source: PubMed Central journal article supplement (PMC4982658; doi:10.1371/journal.pone.0160591), 2016-08-12
Supplement: pone.0160591.s002.pdf [file pone.0160591.s002.pdf]

a

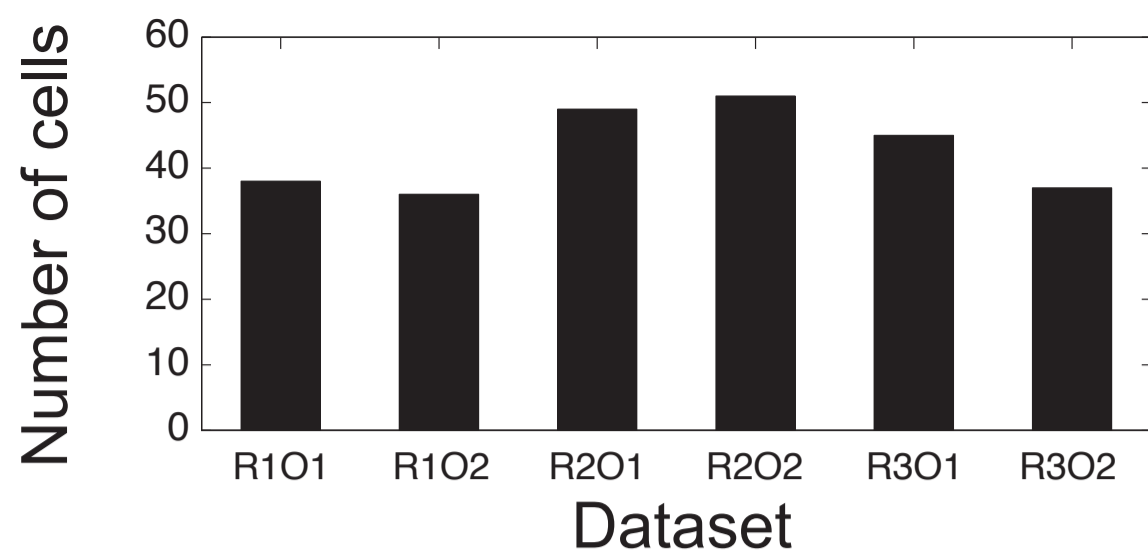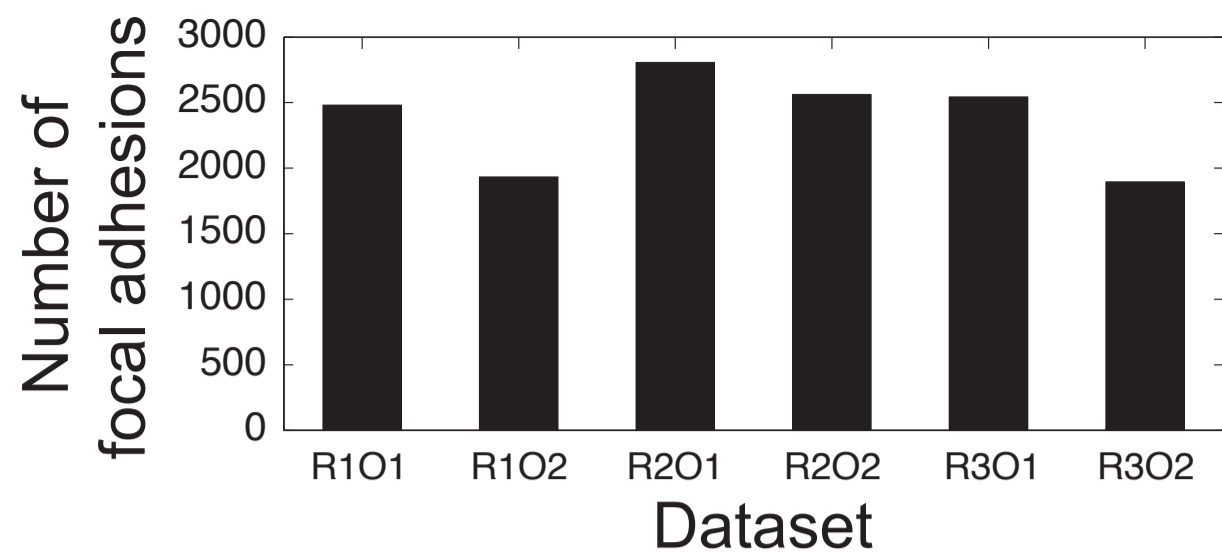

b

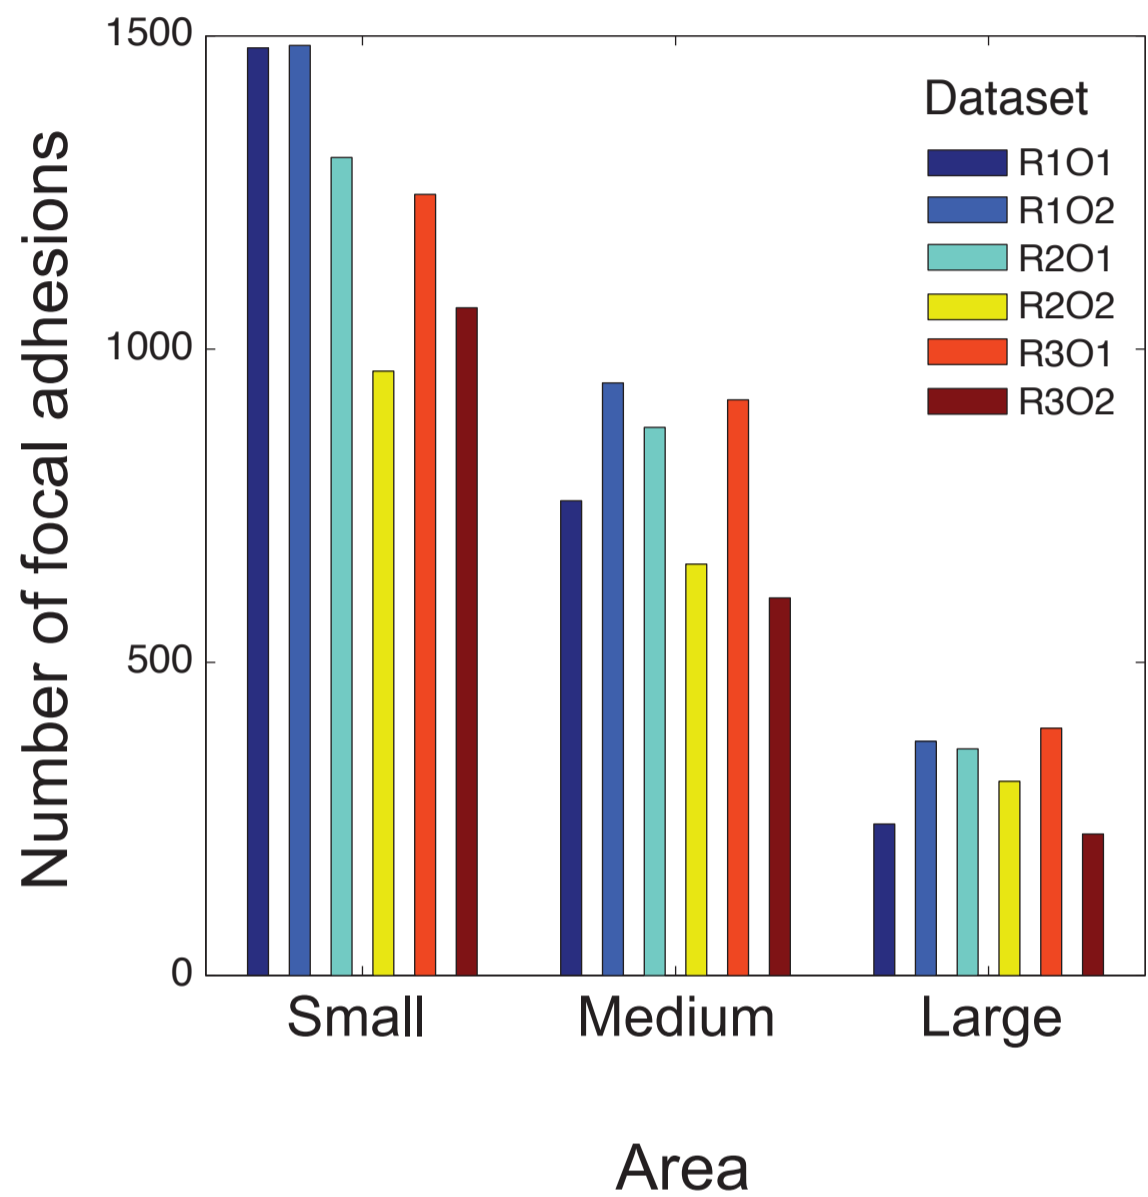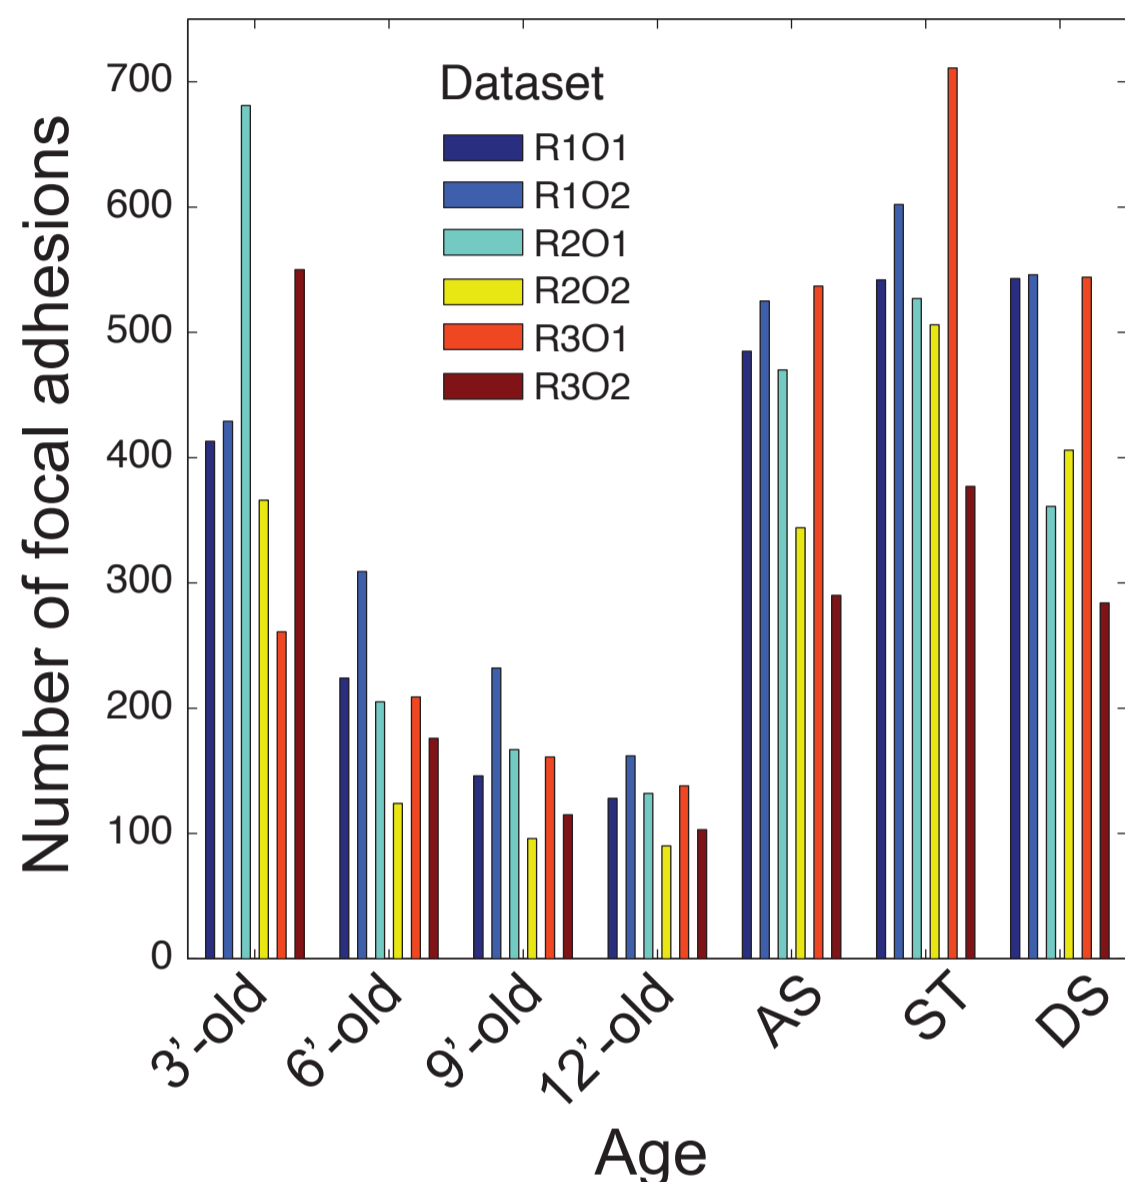

c

| Area   | Age    |        |        |         |     |     |     |
|--------|--------|--------|--------|---------|-----|-----|-----|
|        | 3'-old | 6'-old | 9'-old | 12'-old | AS  | ST  | DS  |
| Small  | 391    | 171    | 113    | 97      | 147 | 256 | 306 |
|        | 386    | 235    | 138    | 86      | 121 | 235 | 284 |
|        | 605    | 144    | 105    | 62      | 81  | 147 | 162 |
|        | 330    | 92     | 57     | 50      | 86  | 177 | 173 |
|        | 220    | 167    | 114    | 94      | 137 | 262 | 253 |
|        | 474    | 123    | 78     | 51      | 71  | 130 | 139 |
| Medium | 21     | 45     | 29     | 29      | 241 | 204 | 189 |
|        | 33     | 62     | 84     | 58      | 272 | 243 | 194 |
|        | 66     | 52     | 54     | 52      | 246 | 261 | 144 |
|        | 28     | 22     | 33     | 34      | 155 | 221 | 164 |
|        | 37     | 34     | 41     | 39      | 247 | 308 | 213 |
|        | 62     | 44     | 33     | 44      | 139 | 171 | 110 |
| Large  | 1      | 8      | 4      | 2       | 97  | 82  | 48  |
|        | 10     | 12     | 10     | 18      | 132 | 124 | 68  |
|        | 10     | 9      | 8      | 18      | 143 | 119 | 55  |
|        | 8      | 10     | 6      | 6       | 103 | 108 | 69  |
|        | 4      | 8      | 6      | 5       | 153 | 141 | 78  |
|        | 14     | 9      | 4      | 8       | 80  | 76  | 35  |

Eccentricity

| Eccentricity |        |      |
|--------------|--------|------|
| Low          | Medium | High |
| 837          | 356    | 288  |
| 780          | 384    | 321  |
| 706          | 294    | 306  |
| 535          | 240    | 190  |
| 611          | 326    | 310  |
| 573          | 254    | 239  |
| 353          | 178    | 227  |
| 540          | 201    | 205  |
| 463          | 212    | 200  |
| 350          | 169    | 138  |
| 418          | 251    | 250  |
| 298          | 166    | 139  |
| 117          | 63     | 62   |
| 205          | 83     | 86   |
| 170          | 108    | 84   |
| 174          | 76     | 60   |
| 196          | 103    | 96   |
| 113          | 59     | 54   |

Internal density

| Internal density |        |      |
|------------------|--------|------|
| Low              | Medium | High |
| 391              | 171    | 113  |
| 386              | 235    | 138  |
| 605              | 144    | 105  |
| 330              | 92     | 57   |
| 220              | 167    | 114  |
| 474              | 123    | 78   |
| 21               | 45     | 29   |
| 33               | 62     | 84   |
| 66               | 52     | 54   |
| 28               | 22     | 33   |
| 37               | 34     | 41   |
| 62               | 44     | 33   |
| 1                | 8      | 4    |
| 10               | 12     | 10   |
| 10               | 9      | 8    |
| 8                | 10     | 6    |
| 4                | 8      | 6    |
| 14               | 9      | 4    |
