# Supplementary material for: Highly Multiplexed Imaging Uncovers Changes in Compositional Noise within Assembling Focal Adhesions
Source: PubMed Central journal article supplement (PMC4982658; doi:10.1371/journal.pone.0160591), 2016-08-12

a

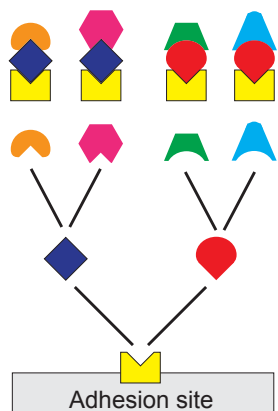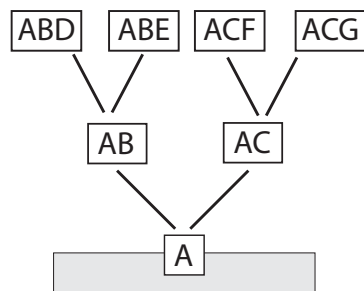

b

$$A^T = A + AB + AC + ABD + ABE + AC + ACF + ACG$$

$$B^T = AB + ABD + ABE$$

$$C^T = AC + ACF + ACG$$

$$D^T = ABD \quad F^T = ACF$$

$$E^T = ABE \quad G^T = ACG$$

c

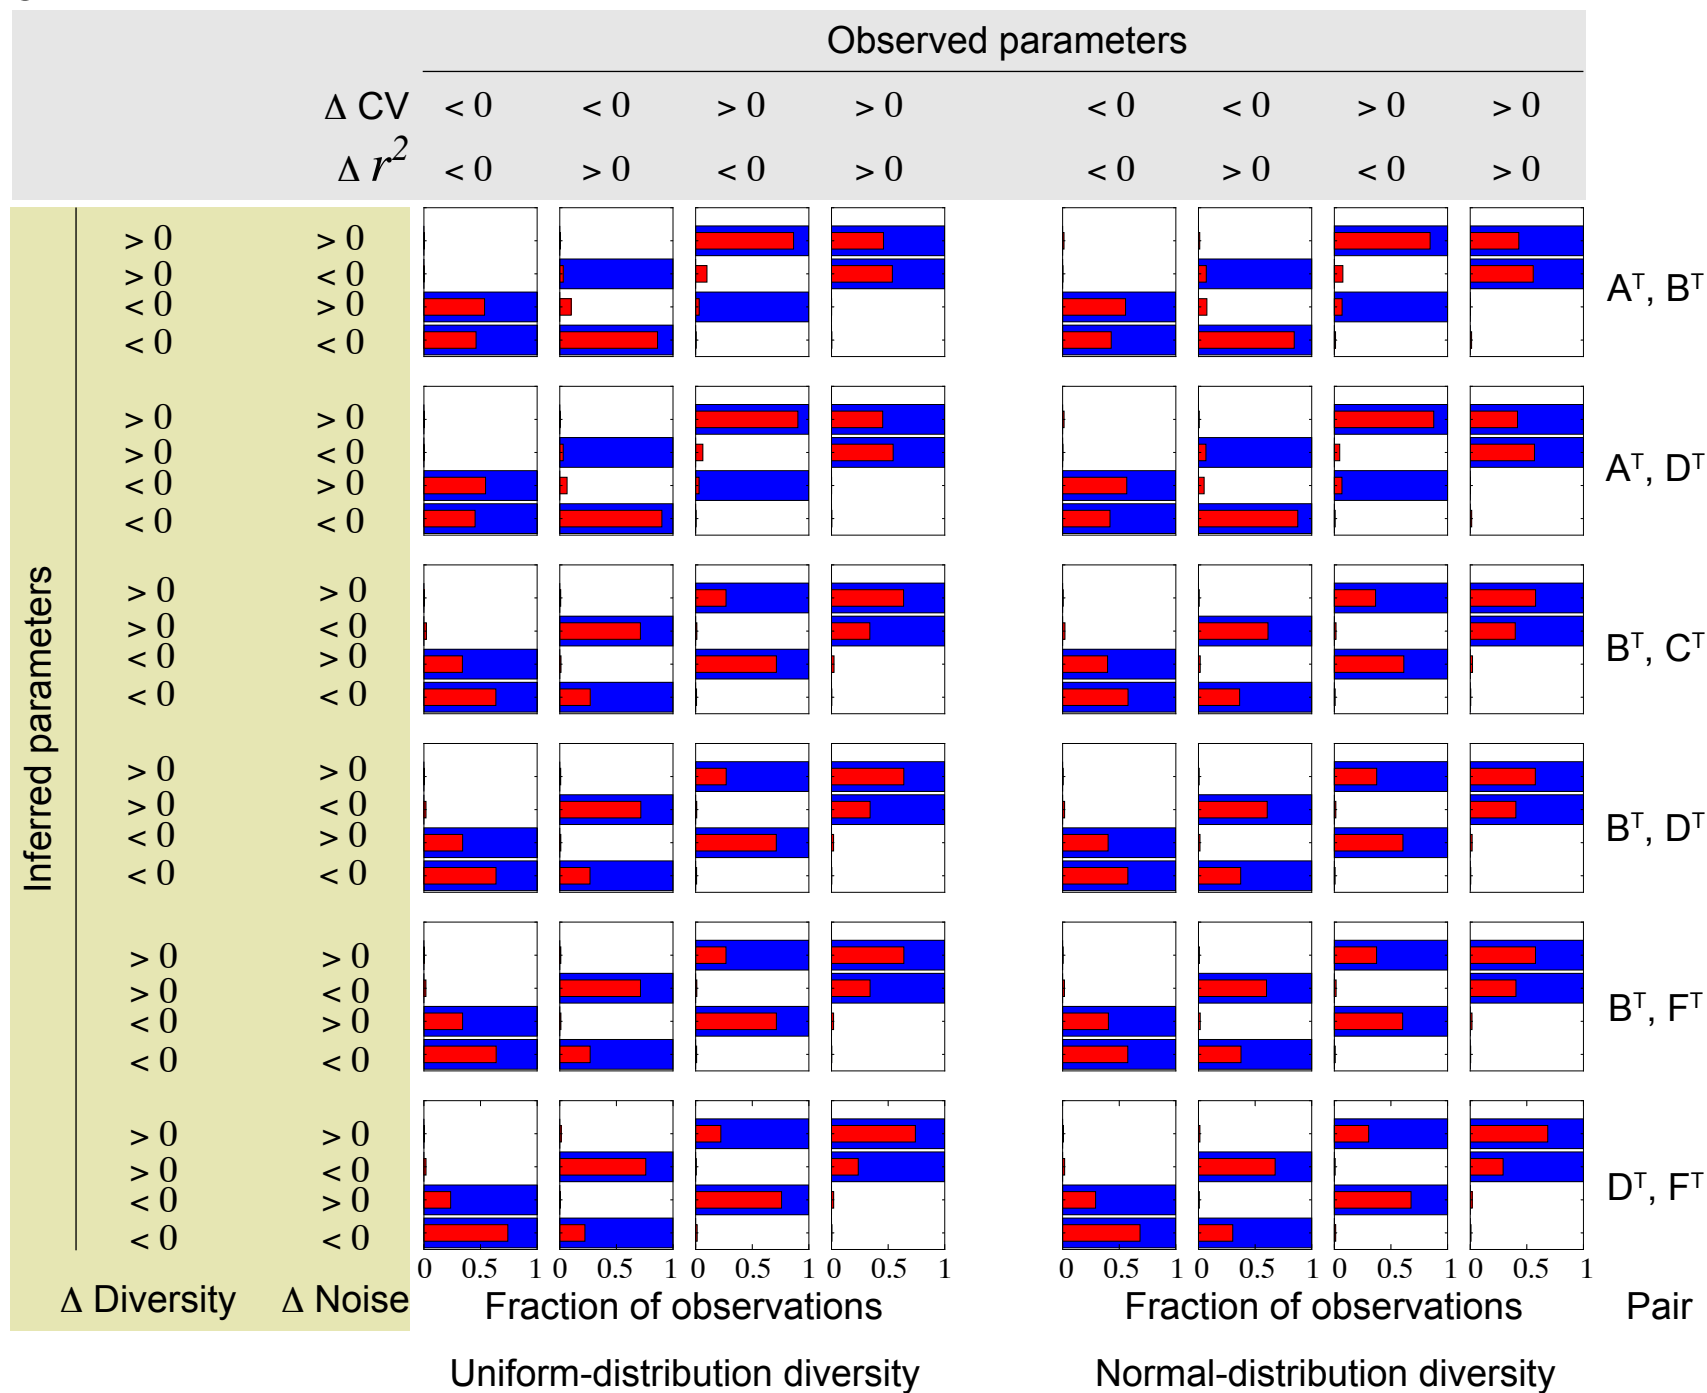

Supplement: pone.0160591.s005.pdf [file pone.0160591.s005.pdf]
