# Supplementary material for: Highly Multiplexed Imaging Uncovers Changes in Compositional Noise within Assembling Focal Adhesions
Source: PubMed Central journal article supplement (PMC4982658; doi:10.1371/journal.pone.0160591), 2016-08-12

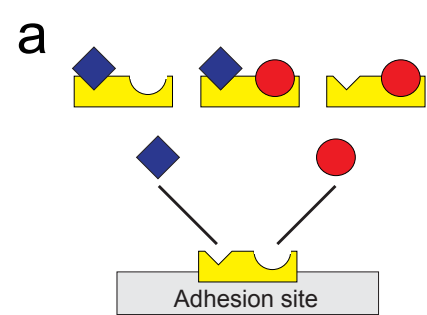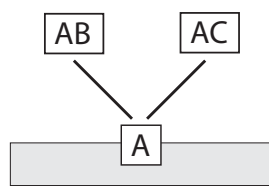

**b**

$$A^T = A + AB + AC + ABC$$

$$B^T = AB + ABC$$

$$C^T = AC + ABC$$

**c**

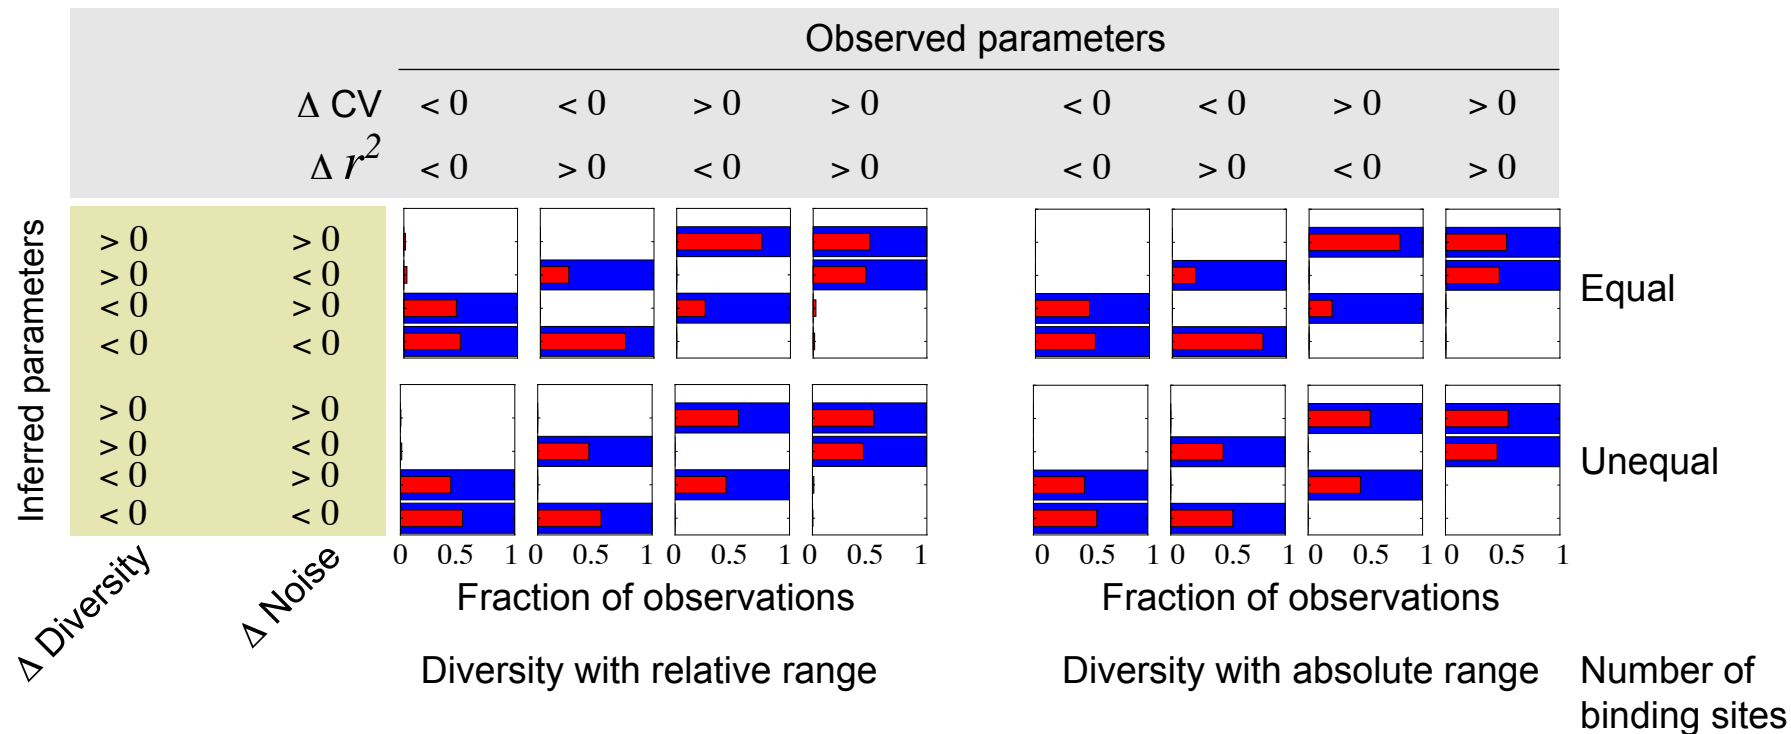

**d**

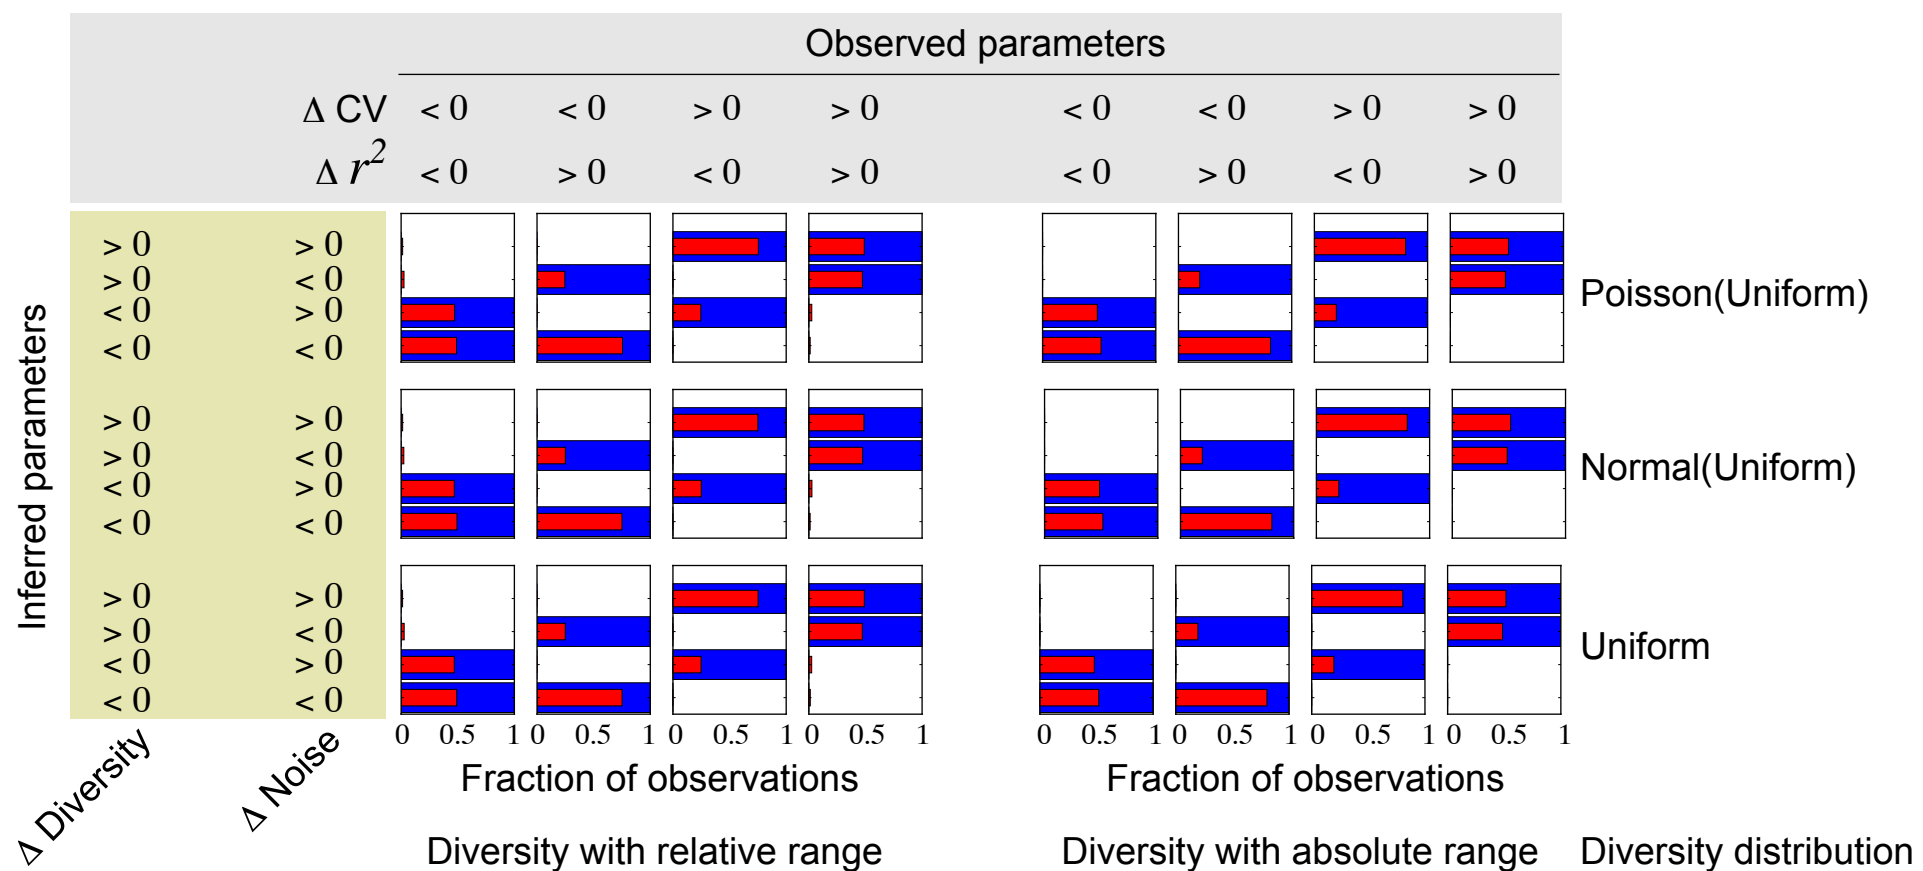

Supplement: pone.0160591.s006.pdf [file pone.0160591.s006.pdf]
