# Supplementary material for: Highly Multiplexed Imaging Uncovers Changes in Compositional Noise within Assembling Focal Adhesions
Source: PubMed Central journal article supplement (PMC4982658; doi:10.1371/journal.pone.0160591), 2016-08-12

**a**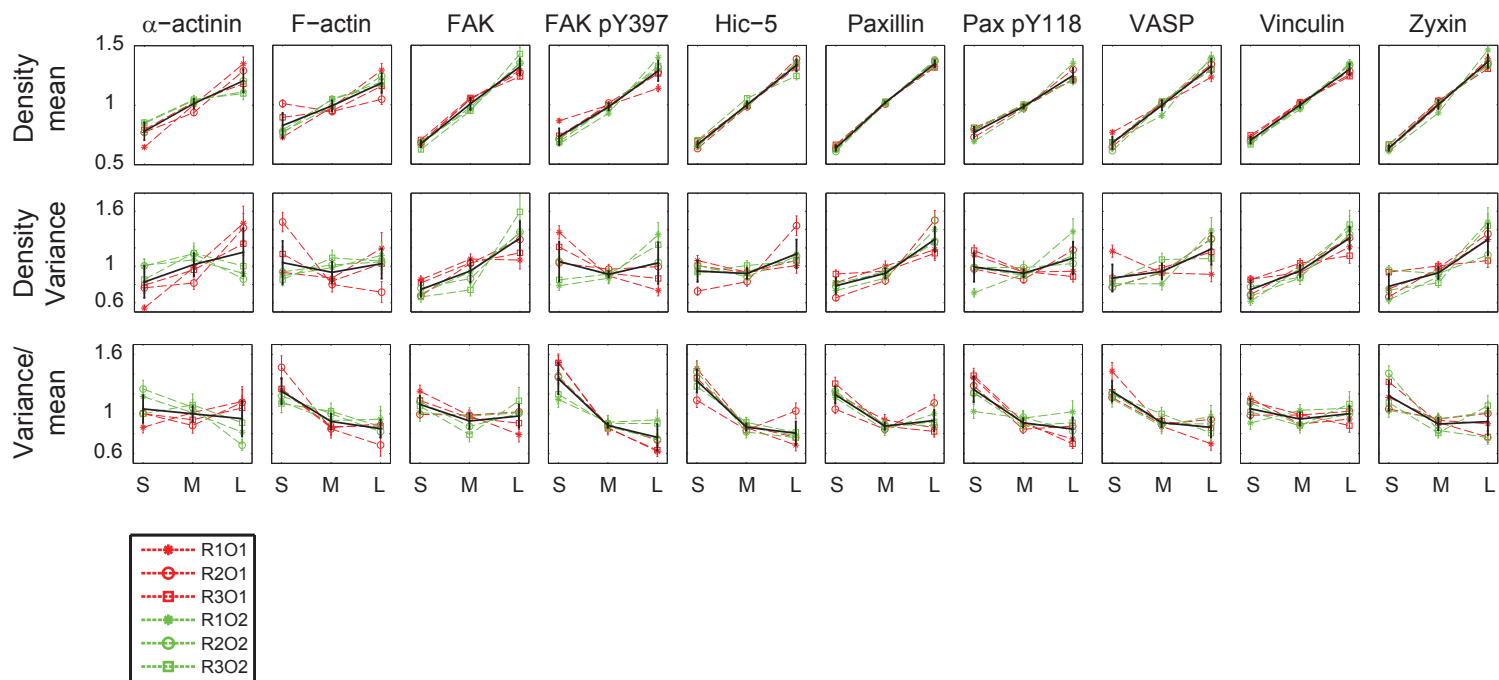**b**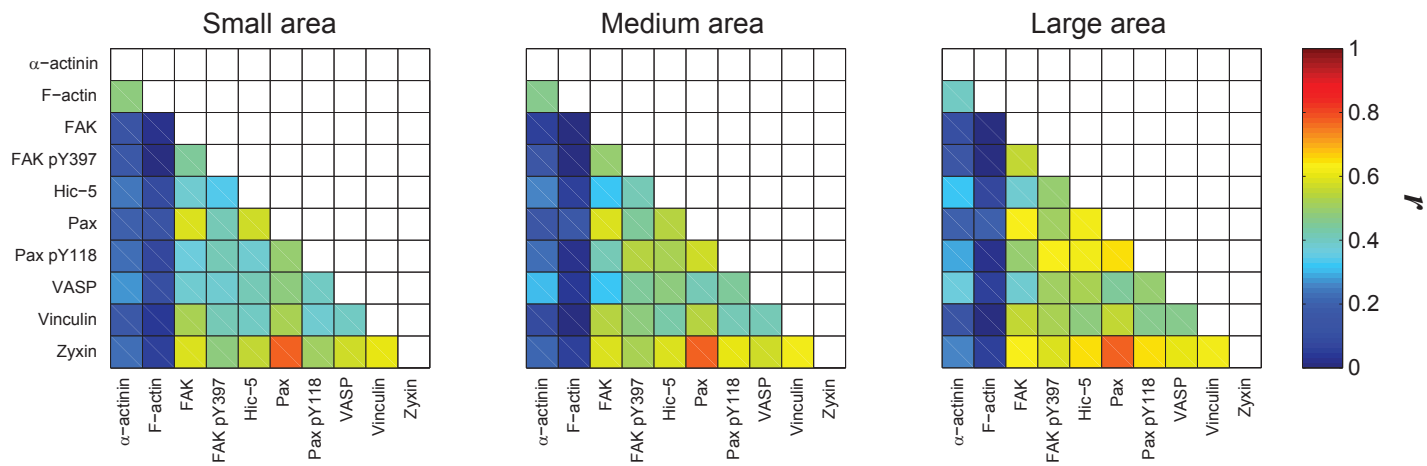

Supplement: pone.0160591.s014.pdf [file pone.0160591.s014.pdf]
