# Supplementary material for: Highly Multiplexed Imaging Uncovers Changes in Compositional Noise within Assembling Focal Adhesions
Source: PubMed Central journal article supplement (PMC4982658; doi:10.1371/journal.pone.0160591), 2016-08-12
Supplement: pone.0160591.s016.pdf [file pone.0160591.s016.pdf]

## Supplementary Table S1

| Order | Cycle 1                               | Cycle 2                    | Cycle 3                    | Cycle 4                               |
|-------|---------------------------------------|----------------------------|----------------------------|---------------------------------------|
| 1     | Vinculin<br>FAK<br>FAK pY397          | Zyxin<br>VASP              | Paxillin<br>Paxillin pY118 | F-actin<br>Hic-5<br>$\alpha$ -Actinin |
| 2     | F-actin<br>Hic-5<br>$\alpha$ -Actinin | Paxillin<br>Paxillin pY118 | Zyxin<br>VASP              | Vinculin<br>FAK<br>FAK pY397          |

**Supplementary Table S1.** The two labeling orders of the components in the CyclIF imaging cycles.
